# Supplementary material
Source: Research Square preprint supplement (doi:10.21203/rs.3.rs-9021080/v1)
Supplement: Supplementary file 1 [file fbb158823a90f7a512a7b91d.docx]

**Table 1.** Mean values of morphological parameters in M1 plants of marigold cv. “Pusa Narangi Gainda” following exposure to EMS mutagen.

| **Traits** | **Seed germination (%)** | | | **Plant height (cm)** | | |
| --- | --- | --- | --- | --- | --- | --- |
| **Treatments** | **6 hr** | **8 hr** | **Mean** | **6 hr** | **8 hr** | **Mean** |
| **M0** | 88.67 | 86.50 | 84.20a | 60.57 | 57.67 | 59.12 a |
| **M10** | 84.33 | 80.25 | 81.40a | 58.33 | 57.27 | 57.80 a |
| **M20** | 81.25 | 79.85 | 79.60a | 56.53 | 56.00 | 56.27 ab |
| **M30** | 74.80 | 71.30 | 72.75b | 55.20 | 54.13 | 54.67bc |
| **M40** | 73.20 | 68.35 | 70.45b | 52.53 | 51.43 | 51.98 cd |
| **M50** | 71.50 | 67.45 | 69.60bc | 51.00 | 49.83 | 50.42 de |
| **M60** | 68.50 | 62.25 | 64.55c | 49.57 | 47.43 | 48.50 e |
| **Mean** | 77.46 | 73.71 | 74.65 | 54.82 | 53.40 | 54.11*$ |

***Note:*** *Values are significantly different at P ≤ 0.05 w.r.t. mutagen dosage; $ Values are significantly different at P ≤ 0.05 w.r.t. soaking time; ! Values are significantly different at P ≤ 0.05 w.r.t. interaction (dosage*time).

**Table 2.** Mean values of morphological parameters in M1 plants of marigold cv. ‘Pusa Narangi Gainda’ following exposure to EMS mutagen.

| **Traits** | **Plant spread (cm)** | | | **Leaf length (cm)** | | | **Leaf width (cm)** | | |
| --- | --- | --- | --- | --- | --- | --- | --- | --- | --- |
| **Treatments** | **6 hr** | **8 hr** | **Mean** | **6 hr** | **8 hr** | **Mean** | **6 hr** | **8 hr** | **Mean** |
| **M0** | 49.53 | 47.97 | 48.75a | 10.57 | 10.00 | 10.28 a | 7.07 | 6.87 | 6.97 a |
| **M10** | 45.90 | 45.30 | 45.60 a | 9.97 | 9.53 | 9.75 ab | 6.90 | 6.57 | 6.73 a |
| **M20** | 42.70 | 41.67 | 42.18 b | 9.17 | 8.93 | 9.05 ab | 6.13 | 5.93 | 6.03 b |
| **M30** | 40.00 | 37.53 | 38.77 c | 8.47 | 8.20 | 8.33bc | 5.67 | 5.40 | 5.53bc |
| **M40** | 37.87 | 36.27 | 37.07 cd | 7.37 | 7.27 | 7.32 cd | 5.47 | 5.27 | 5.37 c |
| **M50** | 36.23 | 34.33 | 35.28 de | 7.00 | 6.33 | 6.67 d | 5.13 | 4.93 | 5.03 cd |
| **M60** | 33.67 | 31.70 | 32.68 e | 6.53 | 6.13 | 6.33 d | 4.63 | 4.73 | 4.68 d |
| **Mean** | 40.84 | 39.25 | 40.05*$ | 8.44 | 8.06 | 8.25* | 5.86 | 5.67 | 5.76* |

***Note:*** *Values are significantly different at P ≤ 0.05 w.r.t. mutagen dosage; $ Values are significantly different at P ≤ 0.05 w.r.t. soaking time; ! Values are significantly different at P ≤ 0.05 w.r.t. interaction (dosage*time).

**Table 3**. Mean values of morphological parameters in M1 plants of marigold cv. “Pusa Narangi Gainda” following exposure to EMS mutagen.

| **Traits** | **Peduncle length (cm)** | | | **No. of primary branches per plant** | | |
| --- | --- | --- | --- | --- | --- | --- |
| **Treatments** | 6 hr | 8 hr | Mean | 6 hr | 8 hr | Mean |
| **M0** | 10.03 | 10.03 | 10.03 a | 11.00 | 10.80 | 10.90a |
| **M10** | 8.80 | 8.53 | 8.67 b | 9.07 | 8.73 | 8.90 b |
| **M20** | 8.50 | 8.17 | 8.33 b | 8.93 | 8.60 | 8.77bc |
| **M30** | 8.00 | 7.80 | 7.90bc | 8.33 | 7.93 | 8.13bcd |
| **M40** | 7.73 | 7.30 | 7.52 cd | 8.00 | 7.67 | 7.83cde |
| **M50** | 7.33 | 6.93 | 7.13 cd | 7.60 | 7.33 | 7.47 de |
| **M60** | 7.07 | 6.73 | 6.90 d | 7.20 | 6.93 | 7.07 e |
| **Mean** | 8.21 | 7.93 | 8.07*$ | 8.59 | 8.29 | 8.44* |

***Note:*** *Values are significantly different at P ≤ 0.05 w.r.t. mutagen dosage; $ Values are significantly different at P ≤ 0.05 w.r.t. soaking time; ! Values are significantly different at P ≤ 0.05 w.r.t. interaction (dosage*time).

**Table 4**. Mean values of morphological parameters in M1 plants of marigold cv. “Pusa Narangi Gainda” following exposure to EMS mutagen.

| **Traits** | **No of flowers per plant** | | | **Flower diameter (cm)** | | |
| --- | --- | --- | --- | --- | --- | --- |
| **Treatments** | **6 hr** | **8 hr** | **Mean** | **6 hr** | **8 hr** | **Mean** |
| **M0** | 80.33 | 82.33 | 81.33 ab | 4.50 | 4.50 | 4.50 a |
| **M10** | 73.00 | 88.00 | 80.50 ab | 4.53 | 3.97 | 4.25abc |
| **M20** | 61.00 | 79.33 | 70.17 b | 4.30 | 4.37 | 4.33 ab |
| **M30** | 81.00 | 89.33 | 85.17 a | 3.77 | 4.23 | 4.00abc |
| **M40** | 75.33 | 74.33 | 74.83 ab | 3.97 | 3.57 | 3.77 c |
| **M50** | 78.67 | 66.33 | 72.50 ab | 4.00 | 3.63 | 3.82bc |
| **M60** | 82.67 | 90.00 | 86.33 a | 3.83 | 4.20 | 4.02abc |
| **Mean** | 76.00 | 81.38 | 78.69*$ | 4.13 | 4.07 | 4.10*! |

***Note:*** *Values are significantly different at P ≤ 0.05 w.r.t. mutagen dosage; $ Values are significantly different at P ≤ 0.05 w.r.t. soaking time; ! Values are significantly different at P ≤ 0.05 w.r.t. interaction (dosage*time).
